# Supplementary material for: Chromosome Genome Assembly and Annotation of the Capitulum mitella With PacBio and Hi-C Sequencing Data
Source: Front Genet. 2021 Aug 18;12:707546. doi: 10.3389/fgene.2021.707546 (PMC8416341; doi:10.3389/fgene.2021.707546)
Supplement: Supplementary Table 4 — KEGG enrichment of genes in the expansion families in C. mitella genome. [file Table_4.XLSX]

## Sheet: Sheet1
Table S4 KEGG enrichment of the expansion families genes identified in C. mitella
GID	Ko	Pathway	Pathway_Name	Pathway_Class
Cami_010110-RA	K02898	ko03010	Ribosome	Genetic Information Processing
Cami_004855-RA	K11674	ko05168	Herpes simplex infection	Human Diseases
Cami_014875-RA	K11674	ko05168	Herpes simplex infection	Human Diseases
Cami_020732-RA	K11674	ko05168	Herpes simplex infection	Human Diseases
Cami_020733-RA	K11674	ko05168	Herpes simplex infection	Human Diseases
Cami_020734-RA	K11674	ko05168	Herpes simplex infection	Human Diseases
Cami_020735-RA	K11674	ko05168	Herpes simplex infection	Human Diseases
Cami_020736-RA	K11674	ko05168	Herpes simplex infection	Human Diseases
Cami_020737-RA	K11674	ko05168	Herpes simplex infection	Human Diseases
Cami_020751-RA	K11674	ko05168	Herpes simplex infection	Human Diseases
Cami_020753-RA	K11674	ko05168	Herpes simplex infection	Human Diseases
Cami_020755-RA	K11674	ko05168	Herpes simplex infection	Human Diseases
Cami_020772-RA	K11674	ko05168	Herpes simplex infection	Human Diseases
Cami_020773-RA	K11674	ko05168	Herpes simplex infection	Human Diseases
Cami_020823-RA	K11674	ko05168	Herpes simplex infection	Human Diseases
Cami_020826-RA	K11674	ko05168	Herpes simplex infection	Human Diseases
Cami_020850-RA	K11674	ko05168	Herpes simplex infection	Human Diseases
Cami_020853-RA	K11674	ko05168	Herpes simplex infection	Human Diseases
Cami_020908-RA	K11674	ko05168	Herpes simplex infection	Human Diseases
Cami_020919-RA	K11674	ko05168	Herpes simplex infection	Human Diseases
Cami_020961-RA	K11674	ko05168	Herpes simplex infection	Human Diseases
Cami_020962-RA	K11674	ko05168	Herpes simplex infection	Human Diseases
Cami_020991-RA	K11674	ko05168	Herpes simplex infection	Human Diseases
Cami_021008-RA	K11674	ko05168	Herpes simplex infection	Human Diseases
Cami_021016-RA	K11674	ko05168	Herpes simplex infection	Human Diseases
Cami_021040-RA	K11674	ko05168	Herpes simplex infection	Human Diseases
Cami_021124-RA	K11674	ko05168	Herpes simplex infection	Human Diseases
Cami_021235-RA	K11674	ko05168	Herpes simplex infection	Human Diseases
Cami_019034-RA	K04828	ko04742	Taste transduction	Organismal Systems
Cami_019034-RA	K04828	ko04750	Inflammatory mediator regulation of TRP channels	Organismal Systems
Cami_019034-RA	K04829	ko04750	Inflammatory mediator regulation of TRP channels	Organismal Systems
Cami_019034-RA	K04830	ko04750	Inflammatory mediator regulation of TRP channels	Organismal Systems
Cami_019034-RA	K04831	ko04750	Inflammatory mediator regulation of TRP channels	Organismal Systems
Cami_019034-RA	K04832	ko04750	Inflammatory mediator regulation of TRP channels	Organismal Systems
Cami_008007-RA	K01758	ko00260	Glycine, serine and threonine metabolism	Metabolism
Cami_008007-RA	K01758	ko00270	Cysteine and methionine metabolism	Metabolism
Cami_008007-RA	K01758	ko00450	Selenocompound metabolism	Metabolism
Cami_011073-RA	K01758	ko00260	Glycine, serine and threonine metabolism	Metabolism
Cami_011073-RA	K01758	ko00270	Cysteine and methionine metabolism	Metabolism
Cami_011073-RA	K01758	ko00450	Selenocompound metabolism	Metabolism
Cami_011074-RA	K01758	ko00260	Glycine, serine and threonine metabolism	Metabolism
Cami_011074-RA	K01758	ko00270	Cysteine and methionine metabolism	Metabolism
Cami_011074-RA	K01758	ko00450	Selenocompound metabolism	Metabolism
Cami_011075-RA	K01758	ko00260	Glycine, serine and threonine metabolism	Metabolism
Cami_011075-RA	K01758	ko00270	Cysteine and methionine metabolism	Metabolism
Cami_011075-RA	K01758	ko00450	Selenocompound metabolism	Metabolism
Cami_011077-RA	K01758	ko00260	Glycine, serine and threonine metabolism	Metabolism
Cami_011077-RA	K01758	ko00270	Cysteine and methionine metabolism	Metabolism
Cami_011077-RA	K01758	ko00450	Selenocompound metabolism	Metabolism
Cami_020811-RA	K01758	ko00260	Glycine, serine and threonine metabolism	Metabolism
Cami_020811-RA	K01758	ko00270	Cysteine and methionine metabolism	Metabolism
Cami_020811-RA	K01758	ko00450	Selenocompound metabolism	Metabolism
Cami_020827-RA	K01758	ko00260	Glycine, serine and threonine metabolism	Metabolism
Cami_020827-RA	K01758	ko00270	Cysteine and methionine metabolism	Metabolism
Cami_020827-RA	K01758	ko00450	Selenocompound metabolism	Metabolism
Cami_020892-RA	K01758	ko00260	Glycine, serine and threonine metabolism	Metabolism
Cami_020892-RA	K01758	ko00270	Cysteine and methionine metabolism	Metabolism
Cami_020892-RA	K01758	ko00450	Selenocompound metabolism	Metabolism
Cami_021023-RA	K01758	ko00260	Glycine, serine and threonine metabolism	Metabolism
Cami_021023-RA	K01758	ko00270	Cysteine and methionine metabolism	Metabolism
Cami_021023-RA	K01758	ko00450	Selenocompound metabolism	Metabolism
Cami_014505-RA	K03910	ko04610	Complement and coagulation cascades	Organismal Systems
Cami_018245-RA	K03910	ko04610	Complement and coagulation cascades	Organismal Systems
Cami_018392-RA	K03910	ko04610	Complement and coagulation cascades	Organismal Systems
Cami_018394-RA	K03910	ko04610	Complement and coagulation cascades	Organismal Systems
Cami_018400-RA	K03910	ko04610	Complement and coagulation cascades	Organismal Systems
Cami_019285-RA	K03910	ko04610	Complement and coagulation cascades	Organismal Systems
Cami_000596-RA	K04804	ko04080	Neuroactive ligand-receptor interaction	Environmental Information Processing
Cami_000596-RA	K04805	ko04080	Neuroactive ligand-receptor interaction	Environmental Information Processing
Cami_000596-RA	K04805	ko04725	Cholinergic synapse	Organismal Systems
Cami_000596-RA	K04806	ko04080	Neuroactive ligand-receptor interaction	Environmental Information Processing
Cami_000596-RA	K04806	ko04725	Cholinergic synapse	Organismal Systems
Cami_000596-RA	K04806	ko05033	Nicotine addiction	Human Diseases
Cami_000596-RA	K04808	ko04080	Neuroactive ligand-receptor interaction	Environmental Information Processing
Cami_000596-RA	K04808	ko04725	Cholinergic synapse	Organismal Systems
Cami_000596-RA	K04808	ko05033	Nicotine addiction	Human Diseases
Cami_000596-RA	K04813	ko04080	Neuroactive ligand-receptor interaction	Environmental Information Processing
Cami_000596-RA	K04813	ko04725	Cholinergic synapse	Organismal Systems
Cami_000596-RA	K04813	ko05033	Nicotine addiction	Human Diseases
Cami_000596-RA	K04815	ko04080	Neuroactive ligand-receptor interaction	Environmental Information Processing
Cami_000596-RA	K04815	ko04725	Cholinergic synapse	Organismal Systems
Cami_007094-RA	K03037	ko03050	Proteasome	Genetic Information Processing
Cami_007094-RA	K03037	ko05169	Epstein-Barr virus infection	Human Diseases
Cami_007095-RA	K03037	ko03050	Proteasome	Genetic Information Processing
Cami_007095-RA	K03037	ko05169	Epstein-Barr virus infection	Human Diseases
Cami_008556-RB	K04396	ko04210	Apoptosis	Cellular Processes
Cami_008556-RC	K04396	ko04210	Apoptosis	Cellular Processes
Cami_008557-RB	K04396	ko04210	Apoptosis	Cellular Processes
Cami_008560-RB	K04396	ko04210	Apoptosis	Cellular Processes
Cami_016754-RA	K13344	ko04146	Peroxisome	Cellular Processes
Cami_016755-RA	K13344	ko04146	Peroxisome	Cellular Processes
Cami_001426-RA	K12825	ko03040	Spliceosome	Genetic Information Processing
Cami_007372-RA	K03014	ko00230	Purine metabolism	Metabolism
Cami_007372-RA	K03014	ko00240	Pyrimidine metabolism	Metabolism
Cami_007372-RA	K03014	ko03020	RNA polymerase	Genetic Information Processing
Cami_007372-RA	K03014	ko04623	Cytosolic DNA-sensing pathway	Organismal Systems
Cami_007372-RA	K03014	ko05016	Huntington disease	Human Diseases
Cami_007374-RA	K03014	ko00230	Purine metabolism	Metabolism
Cami_007374-RA	K03014	ko00240	Pyrimidine metabolism	Metabolism
Cami_007374-RA	K03014	ko03020	RNA polymerase	Genetic Information Processing
Cami_007374-RA	K03014	ko04623	Cytosolic DNA-sensing pathway	Organismal Systems
Cami_007374-RA	K03014	ko05016	Huntington disease	Human Diseases
Cami_012387-RA	K06753	ko04360	Axon guidance	Organismal Systems
Cami_012387-RA	K06754	ko04360	Axon guidance	Organismal Systems
Cami_012387-RA	K06755	ko04360	Axon guidance	Organismal Systems
Cami_012885-RA	K06755	ko04360	Axon guidance	Organismal Systems
Cami_013038-RA	K06753	ko04360	Axon guidance	Organismal Systems
Cami_013038-RA	K06754	ko04360	Axon guidance	Organismal Systems
Cami_013038-RA	K06755	ko04360	Axon guidance	Organismal Systems
Cami_013125-RA	K06753	ko04360	Axon guidance	Organismal Systems
Cami_013125-RA	K06754	ko04360	Axon guidance	Organismal Systems
Cami_013125-RA	K06755	ko04360	Axon guidance	Organismal Systems
Cami_014424-RA	K12190	ko04144	Endocytosis	Cellular Processes
Cami_014424-RB	K12190	ko04144	Endocytosis	Cellular Processes
Cami_009603-RA	K11130	ko03008	Ribosome biogenesis in eukaryotes	Genetic Information Processing
Cami_012124-RA	K11130	ko03008	Ribosome biogenesis in eukaryotes	Genetic Information Processing
Cami_020646-RA	K04716	ko00600	Sphingolipid metabolism	Metabolism
Cami_020646-RA	K04716	ko04071	Sphingolipid signaling pathway	Environmental Information Processing
Cami_021052-RA	K04716	ko00600	Sphingolipid metabolism	Metabolism
Cami_021052-RA	K04716	ko04071	Sphingolipid signaling pathway	Environmental Information Processing
Cami_003239-RA	K05193	ko04080	Neuroactive ligand-receptor interaction	Environmental Information Processing
Cami_003239-RA	K05194	ko04080	Neuroactive ligand-receptor interaction	Environmental Information Processing
Cami_003239-RA	K05195	ko04080	Neuroactive ligand-receptor interaction	Environmental Information Processing
Cami_003694-RA	K05193	ko04080	Neuroactive ligand-receptor interaction	Environmental Information Processing
Cami_003694-RA	K05194	ko04080	Neuroactive ligand-receptor interaction	Environmental Information Processing
Cami_003694-RA	K05195	ko04080	Neuroactive ligand-receptor interaction	Environmental Information Processing
Cami_004112-RA	K05190	ko04080	Neuroactive ligand-receptor interaction	Environmental Information Processing
Cami_004112-RA	K05190	ko04727	GABAergic synapse	Organismal Systems
Cami_004112-RA	K05190	ko04723	Retrograde endocannabinoid signaling	Organismal Systems
Cami_004112-RA	K05190	ko05032	Morphine addiction	Human Diseases
Cami_004112-RA	K05190	ko05033	Nicotine addiction	Human Diseases
Cami_018886-RA	K06560	ko04145	Phagosome	Cellular Processes
Cami_018886-RA	K06560	ko05152	Tuberculosis	Human Diseases
Cami_021262-RA	K02599	ko04330	Notch signaling pathway	Environmental Information Processing
Cami_021262-RA	K02599	ko04658	Th1 and Th2 cell differentiation	Organismal Systems
Cami_021262-RA	K02599	ko04919	Thyroid hormone signaling pathway	Organismal Systems
Cami_021262-RA	K02599	ko04320	Dorso-ventral axis formation	Organismal Systems
Cami_021262-RA	K02599	ko05200	Pathways in cancer	Human Diseases
Cami_021262-RA	K02599	ko05206	MicroRNAs in cancer	Human Diseases
Cami_021262-RA	K02599	ko05224	Breast cancer	Human Diseases
Cami_021262-RA	K02599	ko05020	Prion diseases	Human Diseases
Cami_021262-RA	K02599	ko05165	Human papillomavirus infection	Human Diseases
Cami_021262-RA	K02599	ko01522	Endocrine resistance	Human Diseases
Cami_016395-RA	K10260	ko04120	Ubiquitin mediated proteolysis	Genetic Information Processing
Cami_016396-RA	K10260	ko04120	Ubiquitin mediated proteolysis	Genetic Information Processing
Cami_016397-RA	K10260	ko04120	Ubiquitin mediated proteolysis	Genetic Information Processing
Cami_016398-RA	K10260	ko04120	Ubiquitin mediated proteolysis	Genetic Information Processing
Cami_020764-RA	K10260	ko04120	Ubiquitin mediated proteolysis	Genetic Information Processing
Cami_003878-RA	K04658	ko04350	TGF-beta signaling pathway	Environmental Information Processing
Cami_019888-RA	K04658	ko04350	TGF-beta signaling pathway	Environmental Information Processing
Cami_021286-RA	K10260	ko04120	Ubiquitin mediated proteolysis	Genetic Information Processing
Cami_006577-RA	K06095	ko04391	Hippo signaling pathway - fly	Environmental Information Processing
Cami_006577-RA	K06095	ko04530	Tight junction	Cellular Processes
Cami_020670-RA	K11511	ko03460	Fanconi anemia pathway	Genetic Information Processing
Cami_009201-RA	K10408	ko05016	Huntington disease	Human Diseases
Cami_015795-RA	K10408	ko05016	Huntington disease	Human Diseases
Cami_016041-RA	K13868	ko04974	Protein digestion and absorption	Organismal Systems
Cami_016042-RA	K13868	ko04974	Protein digestion and absorption	Organismal Systems
Cami_016044-RA	K13868	ko04974	Protein digestion and absorption	Organismal Systems
Cami_016046-RA	K13868	ko04974	Protein digestion and absorption	Organismal Systems
Cami_000254-RA	K05193	ko04080	Neuroactive ligand-receptor interaction	Environmental Information Processing
Cami_000254-RA	K05194	ko04080	Neuroactive ligand-receptor interaction	Environmental Information Processing
Cami_000254-RA	K05195	ko04080	Neuroactive ligand-receptor interaction	Environmental Information Processing
Cami_010149-RA	K05193	ko04080	Neuroactive ligand-receptor interaction	Environmental Information Processing
Cami_006259-RA	K05193	ko04080	Neuroactive ligand-receptor interaction	Environmental Information Processing
Cami_006260-RA	K05194	ko04080	Neuroactive ligand-receptor interaction	Environmental Information Processing
Cami_006261-RA	K05194	ko04080	Neuroactive ligand-receptor interaction	Environmental Information Processing
Cami_007323-RA	K05193	ko04080	Neuroactive ligand-receptor interaction	Environmental Information Processing
Cami_018581-RA	K04194	ko04020	Calcium signaling pathway	Environmental Information Processing
Cami_018581-RA	K04194	ko04080	Neuroactive ligand-receptor interaction	Environmental Information Processing
Cami_018581-RA	K04194	ko04911	Insulin secretion	Organismal Systems
Cami_018581-RA	K04194	ko04972	Pancreatic secretion	Organismal Systems
Cami_018581-RA	K04195	ko04020	Calcium signaling pathway	Environmental Information Processing
Cami_018581-RA	K04195	ko04080	Neuroactive ligand-receptor interaction	Environmental Information Processing
Cami_018581-RA	K04195	ko04971	Gastric acid secretion	Organismal Systems
Cami_018581-RA	K08375	ko04080	Neuroactive ligand-receptor interaction	Environmental Information Processing
Cami_011515-RA	K05658	ko02010	ABC transporters	Environmental Information Processing
Cami_011515-RA	K05658	ko04976	Bile secretion	Organismal Systems
Cami_011515-RA	K05658	ko05206	MicroRNAs in cancer	Human Diseases
Cami_011515-RA	K05658	ko05226	Gastric cancer	Human Diseases
Cami_011558-RA	K05658	ko02010	ABC transporters	Environmental Information Processing
Cami_011558-RA	K05658	ko04976	Bile secretion	Organismal Systems
Cami_011558-RA	K05658	ko05206	MicroRNAs in cancer	Human Diseases
Cami_011558-RA	K05658	ko05226	Gastric cancer	Human Diseases
Cami_005132-RA	K10260	ko04120	Ubiquitin mediated proteolysis	Genetic Information Processing
Cami_004859-RA	K08202	ko05231	Choline metabolism in cancer	Human Diseases
Cami_020501-RA	K08202	ko05231	Choline metabolism in cancer	Human Diseases
Cami_008815-RA	K10260	ko04120	Ubiquitin mediated proteolysis	Genetic Information Processing
Cami_016957-RA	K07940	ko04144	Endocytosis	Cellular Processes
Cami_016959-RA	K07940	ko04144	Endocytosis	Cellular Processes
Cami_016961-RA	K07937	ko04072	Phospholipase D signaling pathway	Environmental Information Processing
Cami_016961-RA	K07937	ko04144	Endocytosis	Cellular Processes
Cami_016961-RA	K07937	ko05110	Vibrio cholerae infection	Human Diseases
Cami_016961-RA	K07937	ko05134	Legionellosis	Human Diseases
Cami_016961-RA	K07938	ko04144	Endocytosis	Cellular Processes
Cami_003225-RA	K00669	ko00380	Tryptophan metabolism	Metabolism
Cami_011513-RA	K05658	ko02010	ABC transporters	Environmental Information Processing
Cami_011513-RA	K05658	ko04976	Bile secretion	Organismal Systems
Cami_011513-RA	K05658	ko05206	MicroRNAs in cancer	Human Diseases
Cami_011513-RA	K05658	ko05226	Gastric cancer	Human Diseases
Cami_011559-RA	K05658	ko02010	ABC transporters	Environmental Information Processing
Cami_011559-RA	K05658	ko04976	Bile secretion	Organismal Systems
Cami_011559-RA	K05658	ko05206	MicroRNAs in cancer	Human Diseases
Cami_011559-RA	K05658	ko05226	Gastric cancer	Human Diseases
Cami_011559-RA	K05664	ko02010	ABC transporters	Environmental Information Processing
Cami_011559-RA	K05664	ko04976	Bile secretion	Organismal Systems
Cami_011559-RA	K05664	ko04979	Cholesterol metabolism	Organismal Systems
Cami_011559-RA	K05664	ko01522	Endocrine resistance	Human Diseases
Cami_006135-RA	K10408	ko05016	Huntington disease	Human Diseases
Cami_006136-RA	K10408	ko05016	Huntington disease	Human Diseases
Cami_016856-RA	K00249	ko00640	Propanoate metabolism	Metabolism
Cami_016856-RA	K00249	ko00071	Fatty acid degradation	Metabolism
Cami_016856-RA	K00249	ko00280	Valine, leucine and isoleucine degradation	Metabolism
Cami_016856-RA	K00249	ko00410	beta-Alanine metabolism	Metabolism
Cami_016856-RA	K00249	ko03320	PPAR signaling pathway	Organismal Systems
Cami_021168-RA	K00249	ko00640	Propanoate metabolism	Metabolism
Cami_021168-RA	K00249	ko00071	Fatty acid degradation	Metabolism
Cami_021168-RA	K00249	ko00280	Valine, leucine and isoleucine degradation	Metabolism
Cami_021168-RA	K00249	ko00410	beta-Alanine metabolism	Metabolism
Cami_021168-RA	K00249	ko03320	PPAR signaling pathway	Organismal Systems
Cami_000500-RA	K14616	ko04977	Vitamin digestion and absorption	Organismal Systems
Cami_018629-RA	K14616	ko04977	Vitamin digestion and absorption	Organismal Systems
Cami_004853-RA	K08202	ko05231	Choline metabolism in cancer	Human Diseases
Cami_004858-RA	K08202	ko05231	Choline metabolism in cancer	Human Diseases
Cami_019270-RA	K16507	ko04391	Hippo signaling pathway - fly	Environmental Information Processing
Cami_019270-RA	K16507	ko04392	Hippo signaling pathway - multiple species	Environmental Information Processing
Cami_019448-RA	K16507	ko04391	Hippo signaling pathway - fly	Environmental Information Processing
Cami_019448-RA	K16507	ko04392	Hippo signaling pathway - multiple species	Environmental Information Processing
Cami_019448-RA	K16669	ko04391	Hippo signaling pathway - fly	Environmental Information Processing
Cami_019448-RA	K16669	ko04392	Hippo signaling pathway - multiple species	Environmental Information Processing
Cami_002240-RA	K04426	ko04141	Protein processing in endoplasmic reticulum	Genetic Information Processing
Cami_002240-RA	K04426	ko04010	MAPK signaling pathway	Environmental Information Processing
Cami_002240-RA	K04426	ko04013	MAPK signaling pathway - fly	Environmental Information Processing
Cami_002240-RA	K04426	ko04668	TNF signaling pathway	Environmental Information Processing
Cami_002240-RA	K04426	ko04071	Sphingolipid signaling pathway	Environmental Information Processing
Cami_002240-RA	K04426	ko04210	Apoptosis	Cellular Processes
Cami_002240-RA	K04426	ko04214	Apoptosis - fly	Cellular Processes
Cami_002240-RA	K04426	ko04530	Tight junction	Cellular Processes
Cami_002240-RA	K04426	ko04722	Neurotrophin signaling pathway	Organismal Systems
Cami_002240-RA	K04426	ko04714	Thermogenesis	Organismal Systems
Cami_002240-RA	K04426	ko05014	Amyotrophic lateral sclerosis (ALS)	Human Diseases
Cami_002240-RA	K04426	ko05418	Fluid shear stress and atherosclerosis	Human Diseases
Cami_002240-RA	K04426	ko04932	Non-alcoholic fatty liver disease (NAFLD)	Human Diseases
Cami_002240-RA	K04426	ko01524	Platinum drug resistance	Human Diseases
